# Supplementary material
Source: Springer Nature journal article supplement (https://www.springermedizin.de/resource/supplementary/12985_2010_1084_MOESM1_ESM.pdf/9609106)

Deduced amino acid sequence of  
VR2332 nsp2

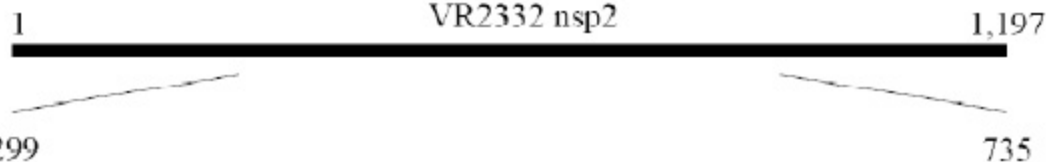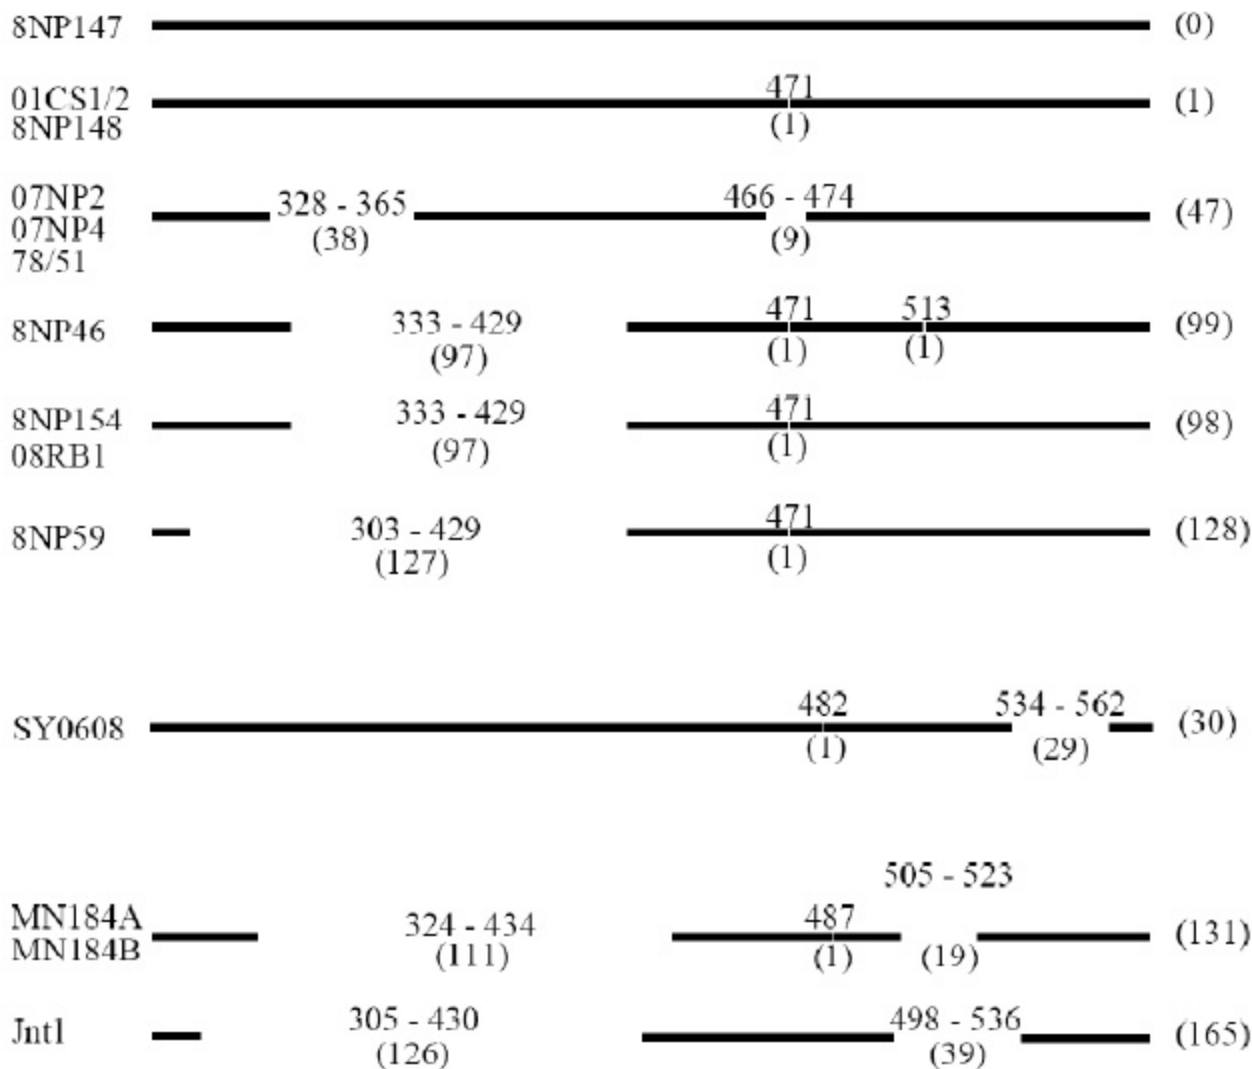

Supplement: MOESM1 [file 9609106]
